# Supplementary material
Source: publisher figshare collection journal article supplement (https://asha.figshare.com/articles/dataset/_/14935812)
Supplement: Supplementary file 1 [file 1]

**Supplemental Material S2.** Additional language testing results.

**Additional participant testing: Philadelphia Naming Test**

|               | Correct | Semantic Errors | Formal Errors | Mixed Errors | Unrelated Errors | Nonword Errors | Non-naming Response | S-Weight | P-Weight |
|---------------|---------|-----------------|---------------|--------------|------------------|----------------|---------------------|----------|----------|
| Participant 1 | 72      | 23              | 6             | 4            | 6                | 35             | 29                  | 0.0182   | 0.0619   |
| Participant 2 | 121     | 10              | 4             | 4            | 0                | 27             | 9                   | 0.0294   | 0.0169   |
| Participant 3 | 151     | 6               | 2             | 5            | 0                | 6              | 5                   | 0.0313   | 0.025    |
| Participant 4 | 129     | 18              | 5             | 12           | 1                | 5              | 5                   | 0.02     | 0.0288   |
| Participant 5 | 63      | 8               | 9             | 8            | 3                | 7              | 77                  | 0.0176   | 0.025    |
| Participant 6 | 117     | 0               | 13            | 1            | 1                | 30             | 13                  | 0.0325   | 0.0151   |
| Participant 7 | 62      | 16              | 2             | 3            | 10               | 1              | 81                  | 0.0151   | 0.0325   |
| Participant 8 | 103     | 6               | 17            | 3            | 3                | 23             | 20                  | 0.0213   | 0.02     |
| Participant 9 | 120     | 5               | 14            | 3            | 1                | 22             | 10                  | 0.0269   | 0.0182   |

**Additional participant testing: Nicholas and Brookshire, Camel and Cactus, PALPA 25 and PALPA 36**

| <b>Assessments</b> | Cactus and Camel   | PALPA 25 |           | PALPA 36 |
|--------------------|--------------------|----------|-----------|----------|
|                    | Percentage Correct | Words    | Non-Words |          |
| Participant 1      | 87.50%             | 70%      | 95%       | 0        |
| Participant 2      | 75.00%             | 100%     | 83.33%    | 7        |
| Participant 3      | 79.69%             | 96.67%   | 95%       | 12       |
| Participant 4      | 71.89%             | 78.33%   | 96.67%    | 0        |
| Participant 5      | 75.00%             | 85%      | 86.67%    | 13       |
| Participant 6      | 92.19%             | 100%     | 96.67%    | 21       |
| Participant 7      | 64.06%             | 25%      | 88.30%    | 1        |
| Participant 8      | 84.40%             | 93.33%   | 98.33%    | 18       |
| Participant 9      | 81.25%             | 93.33%   | 91.67%    | 4        |
